# Supplementary material for: Efficacy of dietary odd-chain saturated fatty acid pentadecanoic acid parallels broad associated health benefits in humans: could it be essential?
Source: PubMed Central journal article supplement (PMC7235264; doi:10.1038/s41598-020-64960-y), 2020-05-18
Supplement: 41598_2020_64960_MOESM1_ESM.pdf [file 41598_2020_64960_MOESM1_ESM.pdf]

**SUPPLEMENTARY INFORMATION**

**Efficacy of dietary odd-chain saturated fatty acid pentadecanoic acid parallels broad associated health benefits in humans: could it be essential?**

Stephanie Venn-Watson<sup>1,2\*</sup>, Richard Lumpkin<sup>2</sup>, Edward A. Dennis<sup>3</sup>

<sup>1</sup>Seraphina Therapeutics, Inc. San Diego, CA 92106

<sup>2</sup> Epitracker Inc., San Diego, CA 92106

<sup>3</sup>Department of Chemistry and Biochemistry and Department of Pharmacology, University of California at San Diego, La Jolla, CA 92093-0601

Supplemental Tables and Figures

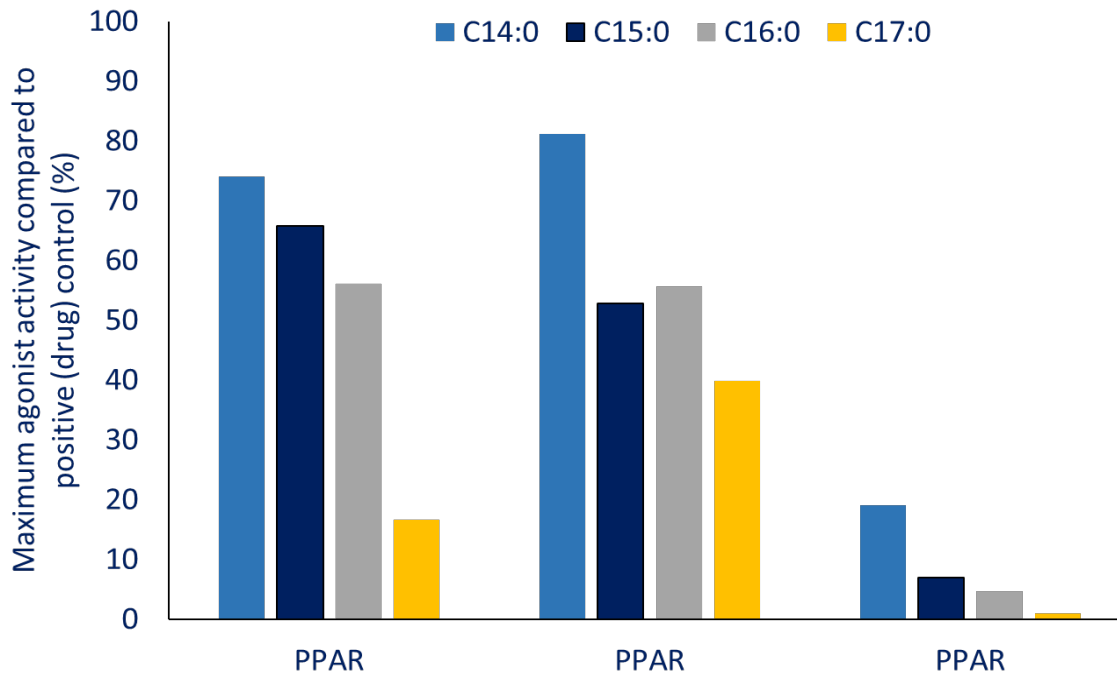

**Supplement Fig 1.** Maximum peroxisome proliferator-activated receptor (PPAR) agonist activities of saturated fatty acids compared to positive controls GW7647, L-165,041 and troglitazone for PPAR $\alpha$ , PPAR $\delta$  and PPAR $\gamma$ , respectively.

**Supplement Table 1.** Use of cell-based assays to evaluate potential off-target pharmacological activities of pentadecanoic acid (C15:0, > 99%), including agonist and antagonist activities relevant to compound safety.

| Target Class | Assay Name   | Assay Target | Mode       | Result Type | Value prefix | RC ( $\mu$ M) |
|--------------|--------------|--------------|------------|-------------|--------------|---------------|
| GPCR         | Calcium Flux | ADORA2A      | Agonist    | EC50        | >            | 20            |
| GPCR         | Calcium Flux | ADRA1A       | Agonist    | EC50        | >            | 20            |
| GPCR         | Calcium Flux | AVPR1A       | Agonist    | EC50        | >            | 20            |
| GPCR         | Calcium Flux | CCKAR        | Agonist    | EC50        | >            | 20            |
| GPCR         | Calcium Flux | CHRM1        | Agonist    | EC50        | >            | 20            |
| GPCR         | Calcium Flux | CHRM3        | Agonist    | EC50        | >            | 20            |
| GPCR         | Calcium Flux | EDNRA        | Agonist    | EC50        | >            | 20            |
| GPCR         | Calcium Flux | HRH1         | Agonist    | EC50        | >            | 20            |
| GPCR         | Calcium Flux | HTR2A        | Agonist    | EC50        | >            | 20            |
| GPCR         | Calcium Flux | HTR2B        | Agonist    | EC50        | >            | 20            |
| GPCR         | Calcium Flux | ADORA2A      | Antagonist | IC50        | >            | 20            |
| GPCR         | Calcium Flux | ADRA1A       | Antagonist | IC50        | >            | 20            |
| GPCR         | Calcium Flux | AVPR1A       | Antagonist | IC50        | >            | 20            |
| GPCR         | Calcium Flux | CCKAR        | Antagonist | IC50        | >            | 20            |
| GPCR         | Calcium Flux | CHRM1        | Antagonist | IC50        | >            | 20            |
| GPCR         | Calcium Flux | CHRM3        | Antagonist | IC50        | >            | 20            |
| GPCR         | Calcium Flux | EDNRA        | Antagonist | IC50        | >            | 20            |
| GPCR         | Calcium Flux | HRH1         | Antagonist | IC50        | >            | 20            |
| GPCR         | Calcium Flux | HTR2A        | Antagonist | IC50        | >            | 20            |
| GPCR         | Calcium Flux | HTR2B        | Antagonist | IC50        | >            | 20            |
| GPCR         | cAMP         | ADORA2A      | Agonist    | EC50        | >            | 20            |
| GPCR         | cAMP         | ADRB1        | Agonist    | EC50        | >            | 20            |
| GPCR         | cAMP         | ADRB2        | Agonist    | EC50        | >            | 20            |
| GPCR         | cAMP         | CHRM2        | Agonist    | EC50        | >            | 20            |
| GPCR         | cAMP         | CNR1         | Agonist    | EC50        | >            | 20            |
| GPCR         | cAMP         | CNR2         | Agonist    | EC50        | >            | 20            |
| GPCR         | cAMP         | DRD1         | Agonist    | EC50        | >            | 20            |
| GPCR         | cAMP         | DRD2S        | Agonist    | EC50        | >            | 20            |
| GPCR         | cAMP         | HRH2         | Agonist    | EC50        | >            | 20            |
| GPCR         | cAMP         | HTR1A        | Agonist    | EC50        | >            | 20            |
| GPCR         | cAMP         | HTR1B        | Agonist    | EC50        | >            | 20            |
| GPCR         | cAMP         | OPRD1        | Agonist    | EC50        | >            | 20            |
| GPCR         | cAMP         | OPRK1        | Agonist    | EC50        | >            | 20            |
| GPCR         | cAMP         | OPRM1        | Agonist    | EC50        | >            | 20            |
| GPCR         | cAMP         | ADORA2A      | Antagonist | IC50        | >            | 20            |

## Venn-Watson et al. C15:0 Efficacy

|                    |                           |               |            |      |   |    |
|--------------------|---------------------------|---------------|------------|------|---|----|
| GPCR               | cAMP                      | ADRB1         | Antagonist | IC50 | > | 20 |
| GPCR               | cAMP                      | ADRB2         | Antagonist | IC50 | > | 20 |
| GPCR               | cAMP                      | CHRM2         | Antagonist | IC50 | > | 20 |
| GPCR               | cAMP                      | CNR1          | Antagonist | IC50 | > | 20 |
| GPCR               | cAMP                      | CNR2          | Antagonist | IC50 | > | 20 |
| GPCR               | cAMP                      | DRD1          | Antagonist | IC50 | > | 20 |
| GPCR               | cAMP                      | DRD2S         | Antagonist | IC50 | > | 20 |
| GPCR               | cAMP                      | HRH2          | Antagonist | IC50 | > | 20 |
| GPCR               | cAMP                      | HTR1A         | Antagonist | IC50 | > | 20 |
| GPCR               | cAMP                      | HTR1B         | Antagonist | IC50 | > | 20 |
| GPCR               | cAMP                      | OPRD1         | Antagonist | IC50 | > | 20 |
| GPCR               | cAMP                      | OPRK1         | Antagonist | IC50 | > | 20 |
| GPCR               | cAMP                      | OPRM1         | Antagonist | IC50 | > | 20 |
| Ion Channel        | Ion Channel               | CAV1.2        | Blocker    | IC50 | > | 20 |
| Ion Channel        | Ion Channel               | GABAA         | Blocker    | IC50 | > | 20 |
| Ion Channel        | Ion Channel               | hERG          | Blocker    | IC50 | > | 20 |
| Ion Channel        | Ion Channel               | HTR3A         | Blocker    | IC50 | > | 20 |
| Ion Channel        | Ion Channel               | KvLQT1/minK   | Blocker    | IC50 | > | 20 |
| Ion Channel        | Ion Channel               | nAChR(a4/b2)  | Blocker    | IC50 | > | 20 |
| Ion Channel        | Ion Channel               | NAV1.5        | Blocker    | IC50 | > | 20 |
| Ion Channel        | Ion Channel               | NMDAR (1A/2B) | Blocker    | IC50 | > | 20 |
| Ion Channel        | Ion Channel               | GABAA         | Opener     | EC50 | > | 20 |
| Ion Channel        | Ion Channel               | HTR3A         | Opener     | EC50 | > | 20 |
| Ion Channel        | Ion Channel               | KvLQT1/minK   | Opener     | EC50 | > | 20 |
| Ion Channel        | Ion Channel               | nAChR(a4/b2)  | Opener     | EC50 | > | 20 |
| Ion Channel        | Ion Channel               | NMDAR (1A/2B) | Opener     | EC50 | > | 20 |
| Kinases            | Binding                   | INSR          | Inhibitor  | IC50 | > | 20 |
| Kinases            | Binding                   | LCK           | Inhibitor  | IC50 | > | 20 |
| Kinases            | Binding                   | ROCK1         | Inhibitor  | IC50 | > | 20 |
| Kinases            | Binding                   | VEGFR2        | Inhibitor  | IC50 | > | 20 |
| NHR                | NHR Nuclear Translocation | AR            | Agonist    | EC50 | > | 20 |
| NHR                | NHR Nuclear Translocation | AR            | Antagonist | IC50 | > | 20 |
| NHR                | NHR Protein Interaction   | GR            | Agonist    | EC50 | > | 20 |
| NHR                | NHR Protein Interaction   | GR            | Antagonist | IC50 | > | 20 |
| Non-Kinase Enzymes | Enzymatic                 | AChE          | Inhibitor  | IC50 | > | 20 |
| Non-Kinase Enzymes | Enzymatic                 | COX1          | Inhibitor  | IC50 | > | 20 |
| Non-Kinase Enzymes | Enzymatic                 | COX2          | Inhibitor  | IC50 | > | 20 |
| Non-Kinase Enzymes | Enzymatic                 | MAOA          | Inhibitor  | IC50 | > | 20 |
| Non-Kinase Enzymes | Enzymatic                 | PDE3A         | Inhibitor  | IC50 | > | 20 |

|                    |             |        |           |      |   |    |
|--------------------|-------------|--------|-----------|------|---|----|
| Non-Kinase Enzymes | Enzymatic   | PDE4D2 | Inhibitor | IC50 | > | 20 |
| Transporter        | Transporter | DAT    | Blocker   | IC50 | > | 20 |
| Transporter        | Transporter | NET    | Blocker   | IC50 | > | 20 |
| Transporter        | Transporter | SERT   | Blocker   | IC50 | > | 20 |

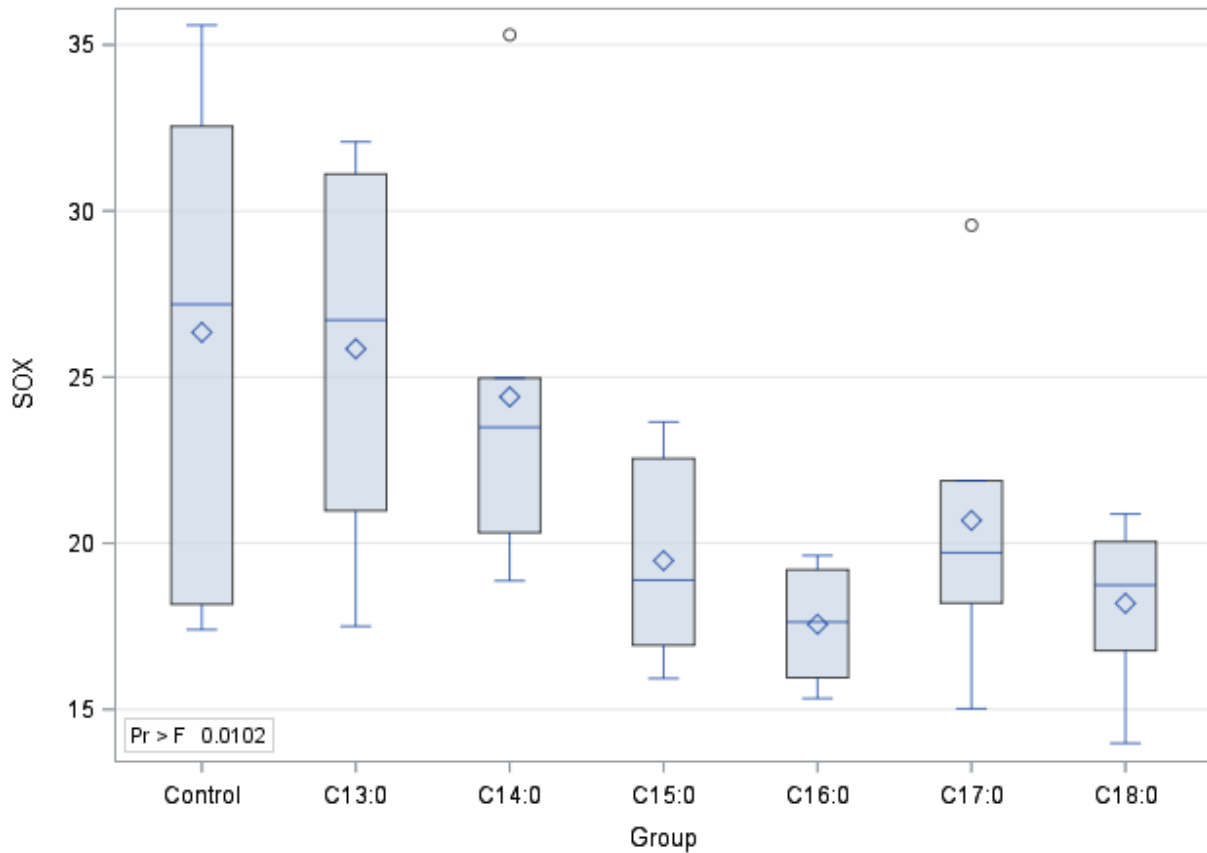

**Supplement Fig 2.** Decreased percent cells with mitochondrial reactive oxygen species (SOX) production in stressed human cell systems treated with different saturated fatty acids at 20  $\mu$ M compared to non-treated controls (n=7 runs per concentration). Endpoint of upper whisker, maximum; upper edge of box, 75<sup>th</sup> percentile; line inside box, median; diamond, mean; lower edge of box, 25<sup>th</sup> percentile; endpoint of lower whisker, minimum; circle, outlier.

**Supplement Table 2.** Evaluation of potential cytotoxicity of C15:0 at four concentrations with a variety of primary human cell systems. Cytotoxicity was defined as a decrease in protein content, measured by Sulforhdamin B (SRB) staining, of 50% ( $\text{Log}_{10}$  of -0.3) or greater than non-exposed control cell systems. Primary human cell systems names are based on the Eurofins Discovery BioMAP Diversity PLUS platform.

| Primary Human Cell System | Primary Human Cell Type                                          | Cytotoxicity Measurement | Log-transformed ratio of cytotoxicity biomarker readout for C15:0-treated sample (n=1) over vehicle controls (n ≥ 6) |                         |                          |                           | Cytotoxic Concentrations |
|---------------------------|------------------------------------------------------------------|--------------------------|----------------------------------------------------------------------------------------------------------------------|-------------------------|--------------------------|---------------------------|--------------------------|
|                           |                                                                  |                          | C15:0, 20 $\mu\text{M}$                                                                                              | C15:0 6.7 $\mu\text{M}$ | C15:0, 2.2 $\mu\text{M}$ | C15:0, 0.74 $\mu\text{M}$ |                          |
| 3C                        | Venular endothelial cells                                        | SRB                      | -0.00165976                                                                                                          | 0.009775274             | 0.004730171              | 0.053479757               | None                     |
| 4H                        | Venular endothelial cells                                        | SRB                      | 0.029839156                                                                                                          | 0.008110998             | -0.004865047             | 0.006280846               | None                     |
| LPS                       | Venular endothelial cells and peripheral blood mononuclear cells | SRB                      | -0.009512417                                                                                                         | -0.005624347            | 0.000525058              | 0.000525058               | None                     |
| SAg                       | Venular endothelial cells                                        | SRB                      | -0.022253469                                                                                                         | 0.030201286             | 0.014647746              | -0.008889508              | None                     |
| BT                        | Primary blood mononuclear cells                                  | SRB                      | 0.03712544                                                                                                           | 0.014101566             | 0.010687284              | -0.009393062              | None                     |
| BF4T                      | Bronchial epithelial cells and dermal fibroblasts                | SRB                      | 0.00198258                                                                                                           | 0.00693601              | -0.017189393             | 0.021185795               | None                     |
| BE3C                      | Bronchial epithelial cells                                       | SRB                      | 3.84485E-05                                                                                                          | -0.031531524            | -0.013710151             | -0.000577136              | None                     |
| CASM3C                    | Coronary artery smooth muscle cells                              | SRB                      | 0.008939704                                                                                                          | 0.01807596              | 0.034825876              | -0.00319706               | None                     |
| HDF3CGF                   | Dermal fibroblasts                                               | SRB                      | -0.019816725                                                                                                         | 0.007378762             | 0.010495189              | -0.01414577               | None                     |
| KF3CT                     | Keratinocytes and dermal fibroblasts                             | SRB                      | -0.003082849                                                                                                         | -0.010100327            | 0.001915727              | -0.00579841               | None                     |
| MyoF                      | Lung fibroblasts                                                 | SRB                      | -0.018901613                                                                                                         | -0.002103599            | -0.008426469             | 0.017832216               | None                     |
| IMphg                     | Venular endothelial cells and macrophages                        | SRB                      | 0.01315957                                                                                                           | -0.00239397             | -0.03165984              | 0.027546791               | None                     |
| IMphg                     | Macrophages alone                                                | SRB                      | -0.058689274                                                                                                         | -0.037816864            | 0.000725812              | 0.023726808               | None                     |

**Supplement Table 3.** Comparisons of indices among Sprague-Dawley rats supplemented with once daily, oral pentadecanoic acid (C15:0, > 98%) (35, 175, and 350 mg/kg body weight) for 14 days with non-supplemented vehicle controls. p value = compared to control group.  
\*Similar minimal to mild changes detected in both supplemented and control groups.

| Safety index (Day 14)                      | Normal range | Vehicle controls (n=10) | Low dose C15:0 (35 mg/kg) (n=10) |           | Moderate dose C15:0 (175 mg/kg) (n=10) |           | High dose C15:0 (350 mg/kg) (n=10) |           |
|--------------------------------------------|--------------|-------------------------|----------------------------------|-----------|----------------------------------------|-----------|------------------------------------|-----------|
|                                            |              | No.                     | No.                              | p value   | No.                                    | p value   | No.                                | p value   |
| <b>Abnormal clinical chemistries (no.)</b> |              |                         |                                  |           |                                        |           |                                    |           |
| Albumin                                    | 3.2 - 4.4    | 1                       | 0                                | 0.5       | 0                                      | 0.5       | 0                                  | 0.5       |
| Alkaline phosphatase                       | 134-588      | 0                       | 1                                | 0.5       | 0                                      | 1.0       | 0                                  | 1.0       |
| ALT                                        | 37-178       | 0                       | 1                                | 0.5       | 1                                      | 0.5       | 0                                  | 1.0       |
| AST                                        | 64-386       | 0                       | 1                                | 0.5       | 0                                      | 1.0       | 0                                  | 1.0       |
| BUN                                        | 7-23         | 3                       | 0                                | 0.1       | 1                                      | 0.3       | 1                                  | 0.3       |
| Calcium                                    | 10.3-14.3    | 0                       | 0                                | 1.0       | 0                                      | 1.0       | 1                                  | 0.5       |
| Cholesterol                                | 64-158       | 1                       | 0                                | 0.5       | 0                                      | 0.5       | 0                                  | 0.5       |
| GGT                                        | 0-7          | 5                       | 2                                | 0.2       | 3                                      | 0.2       | 2                                  | 0.2       |
| Glucose                                    | 110-456      | 1                       | 1                                | 0.5       | 1                                      | 0.5       | 0                                  | 0.5       |
| Potassium                                  | 5.98-11.90   | 2                       | 1                                | 0.4       | 0                                      | 0.2       | 0                                  | 0.2       |
| Sodium                                     | 138.3-171.3  | 0                       | 0                                | 1.00      | 0                                      | 1.0       | 0                                  | 1.0       |
| Phosphorous                                | 7.9-16.6     | 3                       | 2                                | 0.4       | 4                                      | 0.3       | 2                                  | 0.4       |
| Protein                                    | 6.0-8.2      | 1                       | 0                                | 0.5       | 0                                      | 0.5       | 0                                  | 0.5       |
| <b>Total plasma fatty acids (µg/ml)</b>    |              | Mean ± SD               | Mean ± SD                        | p value   | Mean ± SD                              | p value   | Mean ± SD                          | p value   |
| C15:0                                      |              |                         |                                  |           |                                        |           |                                    |           |
| Females (n=5 / group)                      |              | 3 ± 1                   | 3 ± 1                            | 0.27      | 4 ± 1                                  | 0.03      | 10 ± 5                             | 0.02      |
| Males (n=5 / group)                        |              | 5 ± 1                   | 7 ± 1                            | 0.02      | 11 ± 4                                 | 0.02      | 14 ± 4                             | 0.02      |
| C17:0                                      |              |                         |                                  |           |                                        |           |                                    |           |
| Females (n=5 / group)                      |              | 6 ± 1                   | 6 ± 1                            | 0.42      | 7 ± 2                                  | 0.21      | 12 ± 2                             | 0.02      |
| Males (n=5 / group)                        |              | 6 ± 1                   | 7 ± 1                            | 0.02      | 10 ± 2                                 | 0.02      | 11 ± 1                             | 0.02      |
| <b>Normal histology</b>                    |              |                         |                                  |           |                                        |           |                                    |           |
| Females (n=5 / group)                      |              |                         |                                  |           |                                        |           |                                    |           |
| Adrenal glands                             |              | 5                       |                                  |           |                                        |           | 5                                  |           |
| Heart                                      |              | 5                       |                                  |           |                                        |           | 5                                  |           |
| Kidneys                                    |              | 3*                      |                                  |           |                                        |           | 2*                                 |           |
| Liver                                      |              | 1*                      |                                  |           |                                        |           | 0*                                 |           |
| Males (n=5 / group)                        |              |                         |                                  |           |                                        |           |                                    |           |
| Adrenal glands                             |              | 5                       |                                  |           |                                        |           | 5                                  |           |
| Heart                                      |              | 5                       |                                  |           |                                        |           | 3*                                 |           |
| Kidneys                                    |              | 0*                      |                                  |           |                                        |           | 2*                                 |           |
| Liver                                      |              | 1*                      |                                  |           |                                        |           | 0*                                 |           |
| <b>Body weights (g)</b>                    |              | p value                 | Mean ± SD                        | Mean ± SD | Mean ± SD                              | Mean ± SD | Mean ± SD                          | Mean ± SD |
| Females (n=5 / group)                      |              | 0.22                    | 247 ± 12                         | 250 ± 18  | 262 ± 6                                | 260 ± 13  |                                    |           |

|                                           |      |             |             |             |             |
|-------------------------------------------|------|-------------|-------------|-------------|-------------|
| Males (n=5 /group)                        | 0.27 | 347 ± 21    | 362 ± 19    | 343 ± 7     | 344 ± 16    |
| <b>Organ weight to body weight ratios</b> |      |             |             |             |             |
| Females (n=5 / group)                     |      |             |             |             |             |
| Adrenal glands                            |      | 0.03 ± 0.01 | 0.03 ± 0.00 | 0.02 ± 0.00 | 0.03 ± 0.01 |
| Heart                                     |      | 0.41 ± 0.05 | 0.47 ± 0.06 | 0.45 ± 0.07 | 0.47 ± 0.06 |
| Kidneys                                   |      | 0.77 ± 0.05 | 0.75 ± 0.06 | 0.83 ± 0.06 | 0.75 ± 0.03 |
| Liver                                     |      | 4.41 ± 0.65 | 4.37 ± 0.24 | 4.32 ± 0.32 | 4.39 ± 0.13 |
| Males (n=5 / group)                       |      |             |             |             |             |
| Adrenal glands                            |      | 0.02 ± 0.00 | 0.02 ± 0.01 | 0.04 ± 0.06 | 0.02 ± 0.01 |
| Heart                                     |      | 0.43 ± 0.06 | 0.43 ± 0.04 | 0.48 ± 0.08 | 0.46 ± 0.08 |
| Kidneys                                   |      | 0.82 ± 0.04 | 0.84 ± 0.07 | 0.81 ± 0.09 | 0.81 ± 0.08 |
| Liver                                     |      | 4.68 ± 0.14 | 4.92 ± 0.34 | 4.87 ± 0.41 | 4.97 ± 0.31 |

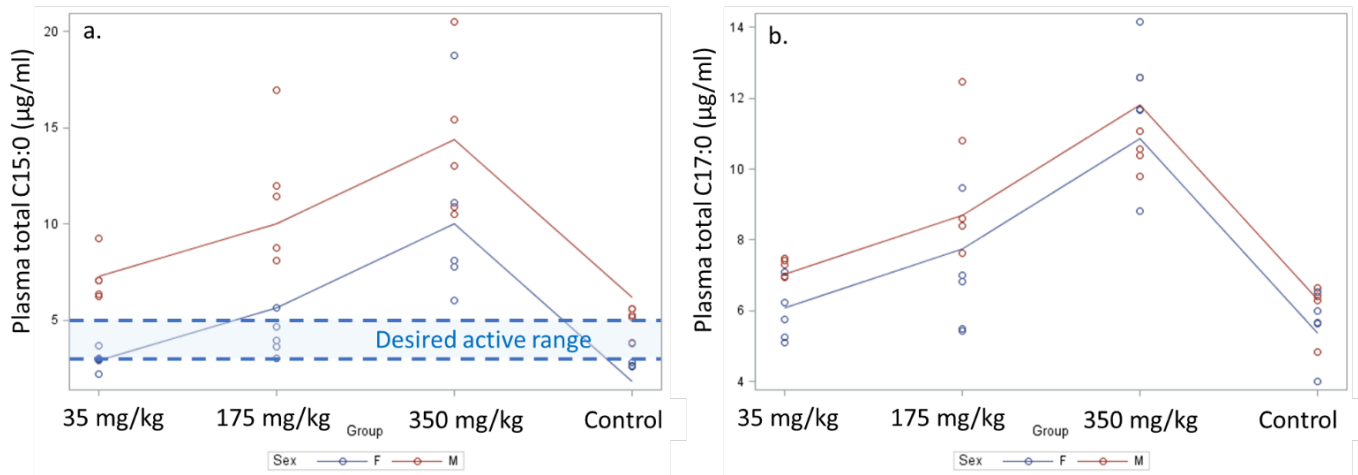

**Supplement Fig 3.** Plasma total C15:0 (a) and C17:0 (b) concentrations at Day 14 in Sprague Dawley rats (n=40 total, 5 females and 5 males per group) supplemented once daily with oral C15:0 (35, 175, and 350 mg/kg body weight).



**Supplement Table 4.** Comparisons of obesity-associated conditions between high fat diet-induced (HFD) obese C57BL/6J mice treated with daily oral odd-chain saturated fatty acids over 12 weeks and non-treated, diseased controls. \*Wilcoxon two-sided P value  $\leq 0.05$  when comparing treatment group with non-treated HFD controls.

| Health variable (Day 84)  | Non-supplemented<br>HFD controls<br>(n=10) | Low-dose<br>C17:0<br>(5 mg/kg)<br>(n=10) | High-dose<br>C17:0<br>(35 mg/kg)<br>(n=10) | Low-dose<br>C15:0<br>(5 mg/kg)<br>(n=10) |
|---------------------------|--------------------------------------------|------------------------------------------|--------------------------------------------|------------------------------------------|
| Glucose (mg/dl)           | 307 $\pm$ 54                               | 296 $\pm$ 23                             | 282 $\pm$ 31                               | 245 $\pm$ 37*                            |
| Insulin (uIU/ml)          | 12.2 $\pm$ 10.5                            | 7.4 $\pm$ 4.8                            | 6.8 $\pm$ 3.5                              | 4.9 $\pm$ 3.8                            |
| Triglycerides (mg/dl)     | 84 $\pm$ 20                                | 70 $\pm$ 10                              | 68 $\pm$ 14                                | 76 $\pm$ 20                              |
| Total cholesterol (mg/dl) | 207 $\pm$ 20                               | 197 $\pm$ 31                             | 187 $\pm$ 44                               | 183 $\pm$ 25*                            |
| IL-18 (pg/ml)             | 206 $\pm$ 84                               | 187 $\pm$ 94                             | 164 $\pm$ 82                               | 144 $\pm$ 63                             |
| IL-6 (pg/ml)              | 60 $\pm$ 68                                | 42 $\pm$ 40                              | 38 $\pm$ 32                                | 19 $\pm$ 11*                             |
| MCP-1 (pg/ml)             | 83 $\pm$ 31                                | 86 $\pm$ 30                              | 53 $\pm$ 32*                               | 52 $\pm$ 25*                             |
| PAI-1 (pg/ml)             | 1.3 $\pm$ 0.4                              | 1.4 $\pm$ 0.5                            | 2.0 $\pm$ 0.9                              | 2.2 $\pm$ 2.0                            |
| TNF $\alpha$ (pg/ml)      | 3.3 $\pm$ 2.1                              | 3.7 $\pm$ 1.9                            | 1.5 $\pm$ 1.5                              | 1.7 $\pm$ 1.0                            |
| Free fatty acids (mmol/L) | 1.0 $\pm$ 0.1                              | 1.0 $\pm$ 0.1                            | 1.0 $\pm$ 0.2                              | 1.5 $\pm$ 1.3                            |
| Ferritin (ng/ml)          | 611 $\pm$ 204                              | 586 $\pm$ 190                            | 604 $\pm$ 127                              | 531 $\pm$ 81                             |
| Body weight (g)           | 43 $\pm$ 7                                 | 43 $\pm$ 6                               | 41 $\pm$ 7                                 | 41 $\pm$ 5                               |
| Body weight change (%)    | 132 $\pm$ 14                               | 127 $\pm$ 9                              | 122 $\pm$ 12                               | 120 $\pm$ 6*                             |

**Supplement Table 5.** Comparisons of indices among Sprague-Dawley rats supplemented with once daily, oral pentadecanoic acid (C15:0, > 98%) (35, 175, and 350 mg/kg body weight) for 14 days with non-supplemented vehicle controls. p value = compared to control group. \*Similar minimal to mild changes detected in both supplemented and control groups.

| Serum lipid species                | Serum concentrations ( $\mu\text{g/ml}$ ) |                                   | p value |
|------------------------------------|-------------------------------------------|-----------------------------------|---------|
|                                    | Controls<br>(n=4)                         | C15:0 dosed<br>(5 mg/kg)<br>(n=8) |         |
| C15:0 cholesterol ester            | $3.6 \pm 0.4$                             | $2.9 \pm 1.1$                     | 0.15    |
| C15:0 diacylglycerol               | $0.06 \pm 0.07$                           | $0.06 \pm 0.07$                   | 0.50    |
| C15:0 free fatty acid              | $7.1 \pm 0.7$                             | $6.8 \pm 1.8$                     | 0.40    |
| C15:0 lysophosphatidylcholine      | $1.1 \pm 0.1$                             | $1.1 \pm 0.4$                     | 0.28    |
| C15:0 lysophosphatidylethanolamine | $0 \pm 0$                                 | $0.02 \pm 0.02$                   | 0.05    |
| C15:0 phosphatidylcholine          | $0.8 \pm 0.4$                             | $1.4 \pm 0.8$                     | 0.11    |
| C15:0 triacylglycerol              | $2.4 \pm 1.3$                             | $2.4 \pm 1.1$                     | 0.40    |
| C17:0 cholesterol ester            | $2.6 \pm 0.1$                             | $2.0 \pm 0.6$                     | 0.02    |
| C17:0 free fatty acid              | $15 \pm 1$                                | $13 \pm 3$                        | 0.07    |
| C17:0 lysophosphatidylethanolamine | $0 \pm 0$                                 | $0.04 \pm 0.01$                   | 0.03    |
| C17:0 phosphatidylethanolamine     | $0.2 \pm 0.4$                             | $0.2 \pm 0.4$                     | 0.46    |
| C17:0 triacylglycerol              | $3.9 \pm 3.1$                             | $3.7 \pm 2.3$                     | 0.47    |

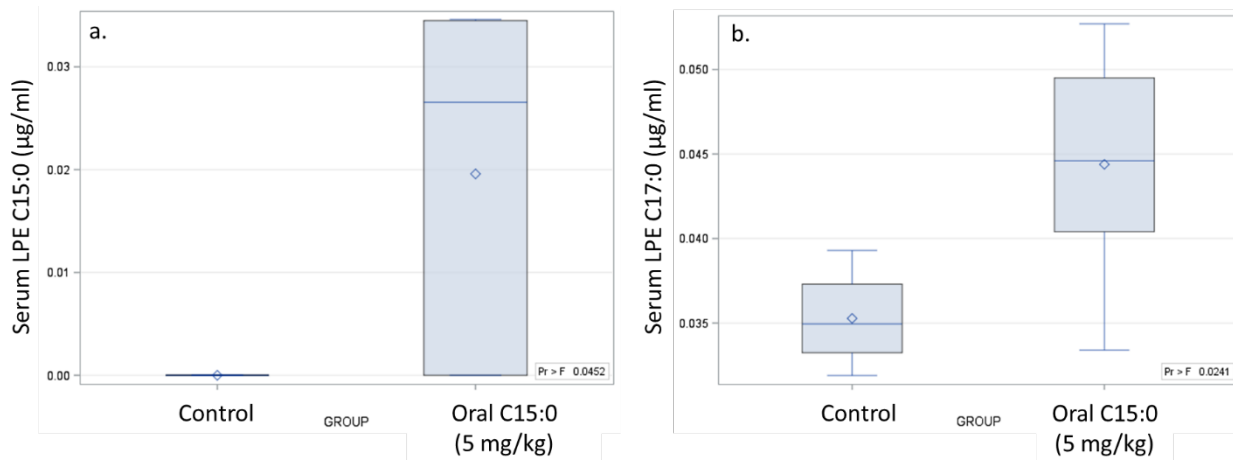

**Supplement Fig 4.** Serum lysophosphatidylethanolamide (LPE) C15:0 (a) and LPE C17:0 (b) concentrations at Day 90 in male C57BL/6J diet-induced obese mice treated once daily with oral C15:0 (5 mg/kg body weight, n=8) compared to controls (n=4).

**Supplement Table 6.** Comparisons of NASH-associated conditions between high fat, high cholesterol diet-induced (HFHC) NASH rabbits treated with daily oral C15:0 (35 mg/kg) over 11 weeks and non-treated, diseased controls. Wilcoxon two-sided P value  $\leq 0.05^*$ ,  $\leq 0.01^{**}$  when comparing treatment group with non-treated HFHC diet controls.  $^{\wedge}$ Wilcoxon two-sided P value  $\leq 0.05$  compared to standard diet controls.

| Health Variables<br>(Day 77)          | Standard<br>diet controls<br>(n=8) | Non-supplemented<br>HFHC diet controls<br>(n=8) | C15:0-supplemented<br>HFHC diet group<br>(n=8) |
|---------------------------------------|------------------------------------|-------------------------------------------------|------------------------------------------------|
| <b>Liver Health</b>                   |                                    |                                                 |                                                |
| <i>Blood-based indices</i>            |                                    |                                                 |                                                |
| Icterus (mg/dl)                       | 0 ± 0                              | 2.3 ± 2.8 $^{\wedge}$                           | 0.4 ± 0.5 $^{**}$                              |
| Total bilirubin (mg/dl)               | 0 ± 0                              | 0.5 ± 0.3 $^{\wedge}$                           | 0.0 ± 0.1 $^{**}$                              |
| ALT (IU/L)                            | 30 ± 9                             | 23 ± 11                                         | 25 ± 11                                        |
| AST (IU/L)                            | 18 ± 9                             | 34 ± 15 $^{\wedge}$                             | 26 ± 13                                        |
| GGT (IU/L)                            | 7 ± 1                              | 132 ± 174 $^{\wedge}$                           | 240 ± 241 $^{\wedge}$                          |
| Albumin (g/dl)                        | 4.1 ± 0.5                          | 3.2 ± 0.4 $^{\wedge}$                           | 3.8 ± 0.3 $^{**}$                              |
| <i>Liver histology scores</i>         |                                    |                                                 |                                                |
| Fibrosis score                        | n/a                                | 2.9 ± 0.4                                       | 2.3 ± 0.5 $^*$                                 |
| Fibrosis pixel                        | n/a                                | 3.0 ± 0.8                                       | 2.1 ± 0.8                                      |
| Hepatocyte ballooning                 | n/a                                | 1.0 ± 0                                         | 1.0 ± 0                                        |
| Lobular inflammation                  | n/a                                | 1.0 ± 0                                         | 1.1 ± 0.4                                      |
| Microgranuloma                        | n/a                                | 0.6 ± 0.5                                       | 0.5 ± 0.5                                      |
| Steatosis grade score                 | n/a                                | 2.8 ± 0.7                                       | 3.0 ± 0                                        |
| Steatosis location                    | n/a                                | 1.0 ± 0                                         | 1.0 ± 0                                        |
| Microvesicular steatosis              | n/a                                | 1.0 ± 0                                         | 1.0 ± 0                                        |
| NAFLD score                           | n/a                                | 4.8 ± 0.7                                       | 5.1 ± 0.4                                      |
| <b>Iron Status</b>                    |                                    |                                                 |                                                |
| <i>Blood-based indices</i>            |                                    |                                                 |                                                |
| Iron (μg/dl)                          | 281 ± 38                           | 229 ± 143 $^{\wedge}$                           | 200 ± 20 $^{\wedge}$                           |
| Ferritin (ng/ml)                      | 17 ± 19                            | 11 ± 2                                          | 10 ± 2                                         |
| UIBC (μg/dl)                          | 0 ± 0                              | 150 ± 180 $^{\wedge}$                           | 86 ± 49 $^{\wedge}$                            |
| TIBC (μg/dl)                          | 0 ± 0                              | 195 ± 259                                       | 240 ± 133 $^{\wedge}$                          |
| Transferrin saturation (%)            | 85 ± 1                             | 65 ± 29                                         | 65 ± 11 $^{\wedge}$                            |
| <i>Liver histology</i>                |                                    |                                                 |                                                |
| Iron staining score (0-3)             | n/a                                | 1.1 ± 0.4                                       | 0.4 ± 0.5 $^{**}$                              |
| <b>Red Blood Cell Indices</b>         |                                    |                                                 |                                                |
| Nucleated cells (10 <sup>3</sup> /μl) | 4.1 ± 1.4                          | 13 ± 9 $^{\wedge}$                              | 8 ± 1 $^{\wedge*}$                             |
| Hemoglobin (g/dl)                     | 15 ± 0.4                           | 9 ± 2 $^{\wedge}$                               | 14 ± 1 $^{\wedge**}$                           |
| Hematocrit (%)                        | 46 ± 2                             | 25 ± 5 $^{\wedge}$                              | 38 ± 4 $^{\wedge**}$                           |
| Red blood cells (10 <sup>6</sup> /μl) | 7.3 ± 0.3                          | 3.5 ± 1.2 $^{\wedge}$                           | 6.0 ± 0.7 $^{\wedge**}$                        |
| MCV (fl)                              | 63 ± 2.3                           | 79 ± 21 $^{\wedge}$                             | 64 ± 2 $^{**}$                                 |
| MCH (pg)                              | 21 ± 1                             | 27 ± 5 $^{\wedge}$                              | 23 ± 1 $^{\wedge}$                             |
| MCHC (g/dl)                           | 33 ± 1                             | 33 ± 4                                          | 36 ± 1 $^{\wedge**}$                           |
| Red blood cell distribution width (%) | 13 ± 1                             | 21 ± 3 $^{\wedge}$                              | 15 ± 1 $^{\wedge**}$                           |
| Reticulocytes (%)                     | 2 ± 1                              | 30 ± 22 $^{\wedge}$                             | 6 ± 2 $^{\wedge**}$                            |
| Reticulocytes (actual)                | 181 ± 39                           | 885 ± 497 $^{\wedge}$                           | 334 ± 71 $^{\wedge**}$                         |
| <b>Lipids and Cardiovascular</b>      |                                    |                                                 |                                                |

|                                 |           |                          |                          |
|---------------------------------|-----------|--------------------------|--------------------------|
| <i>Blood-based indices</i>      |           |                          |                          |
| Total cholesterol (mg/dl)       | 23 ± 7    | 3576 ± 1018 <sup>^</sup> | 2516 ± 746 <sup>^*</sup> |
| Triglycerides (mg/dl)           | 71 ± 38   | 755 ± 555 <sup>^</sup>   | 235 ± 132 <sup>^**</sup> |
| Platelets (10 <sup>3</sup> /μl) | 335 ± 75  | 639 ± 123 <sup>^</sup>   | 485 ± 87 <sup>^*</sup>   |
| MPV (fl)                        | 6.3 ± 0.4 | 9.3 ± 2.3 <sup>^</sup>   | 7.6 ± 0.6 <sup>^</sup>   |
| <i>Other</i>                    |           |                          |                          |
| Mean arterial blood pressure    | 72 ± 15   | 57 ± 12 <sup>^</sup>     | 74 ± 14 <sup>*</sup>     |
| <b>Inflammation</b>             |           |                          |                          |
| Globulins (g/dl)                | 1.9 ± 0.6 | 2.2 ± 0.3                | 1.1 ± 0.8 <sup>**</sup>  |
| C-reactive protein (ng/ml)      | 27 ± 10   | 71 ± 63 <sup>^</sup>     | 40 ± 15 <sup>^</sup>     |
| <b>Other Health Indices</b>     |           |                          |                          |
| Glucose (mg/dl)                 | 191 ± 19  | 124 ± 13 <sup>^</sup>    | 145 ± 13 <sup>^**</sup>  |
| Insulin (uIU/ml)                | 3.7 ± 1.9 | 2.0 ± 0 <sup>^</sup>     | 2.0 ± 0 <sup>^</sup>     |
| Creatine kinase (IU/L)          | 559 ± 168 | 2913 ± 2396 <sup>^</sup> | 731 ± 311 <sup>**</sup>  |
| Alkaline phosphatase (IU/L)     | 55 ± 15   | 53 ± 23                  | 52 ± 16                  |
| Sodium (mEQ/L)                  | 144 ± 1   | 132 ± 4 <sup>^</sup>     | 136 ± 3 <sup>^*</sup>    |
| Chloride (mEQ/L)                | 102 ± 1   | 92 ± 4 <sup>^</sup>      | 96 ± 1 <sup>^*</sup>     |
| Potassium (mEQ/L)               | 3.1 ± 0.4 | 3.2 ± 0.4                | 3.1 ± 0.3                |
| Bicarbonate (mEQ/L)             | 20 ± 3    | 18 ± 3                   | 20 ± 2                   |
| Anion gap (mmol/L)              | 25 ± 3    | 26 ± 4                   | 24 ± 2                   |
| Osmolality (mOsm/kg)            | 292 ± 2   | 267 ± 7 <sup>^</sup>     | 274 ± 5 <sup>^</sup>     |

---
